# Supplementary material for: The influence mechanism of the molecular structure on the peak current and peak potential in electrochemical detection of typical quinolone antibiotics
Source: Royal Society of Chemistry journal article supplement (doi:10.1039/d1cp01358k), 2021-01-01
Supplement: d1cp01358k1.pdf [file d1cp01358k1.pdf]

**The influence mechanism of molecular structure on peak current and peak  
potential in electrochemical detection of typical quinolone antibiotics**

Jiawei Li,<sup>a,c,d</sup> Qiang Xue,\*<sup>a,b</sup> Tao Chen,<sup>a,b</sup> Fei Liu,<sup>a,b</sup> Qun Wang,<sup>a,b</sup> Chunwen Chang,<sup>a,b</sup> Xiaohua

Lu,<sup>e</sup> Taogeng Zhou,<sup>f</sup> Osamu Niwa,<sup>g</sup>

<sup>a</sup>MOE Key Laboratory of Groundwater Circulation and Environmental Evolution, China

University of Geosciences (Beijing), Beijing 100083, P.R. China

<sup>b</sup> Beijing Key Laboratory of Water Resources and Environmental Engineering, School of Water

Resources and Environment, China University of Geosciences (Beijing), Beijing 100083, PR China.

<sup>c</sup> Aerospace Seahawk Electromechanical Technology Research Institute Co., Ltd. 100074,

Beijing, China

<sup>d</sup> Beijing Jinghang Institute of Computing and Communication, 100074, Beijing, China

<sup>e</sup> National Institute of Metrology, No. 18, Bei San Huan Dong Lu, 100022, Beijing, China

<sup>f</sup> Beijing Institute of Technology, No. 5, South Zhongguancun Street, 100081, Beijing, China

<sup>g</sup> Saitama Institute of Technology, 1690, Fusaiji, Fukaya, Saitama, 369-0293, Japan

**\*Corresponding author: Qiang Xue**

E-mail: [xueqiang@cugb.edu.cn](mailto:xueqiang@cugb.edu.cn)

## Supplementary Material 1

As shown in Figure S1, it is clear that there is a good linear fit between the peak current and scan rate (or square root of scan rate), indicating that it is a surface-confined process.

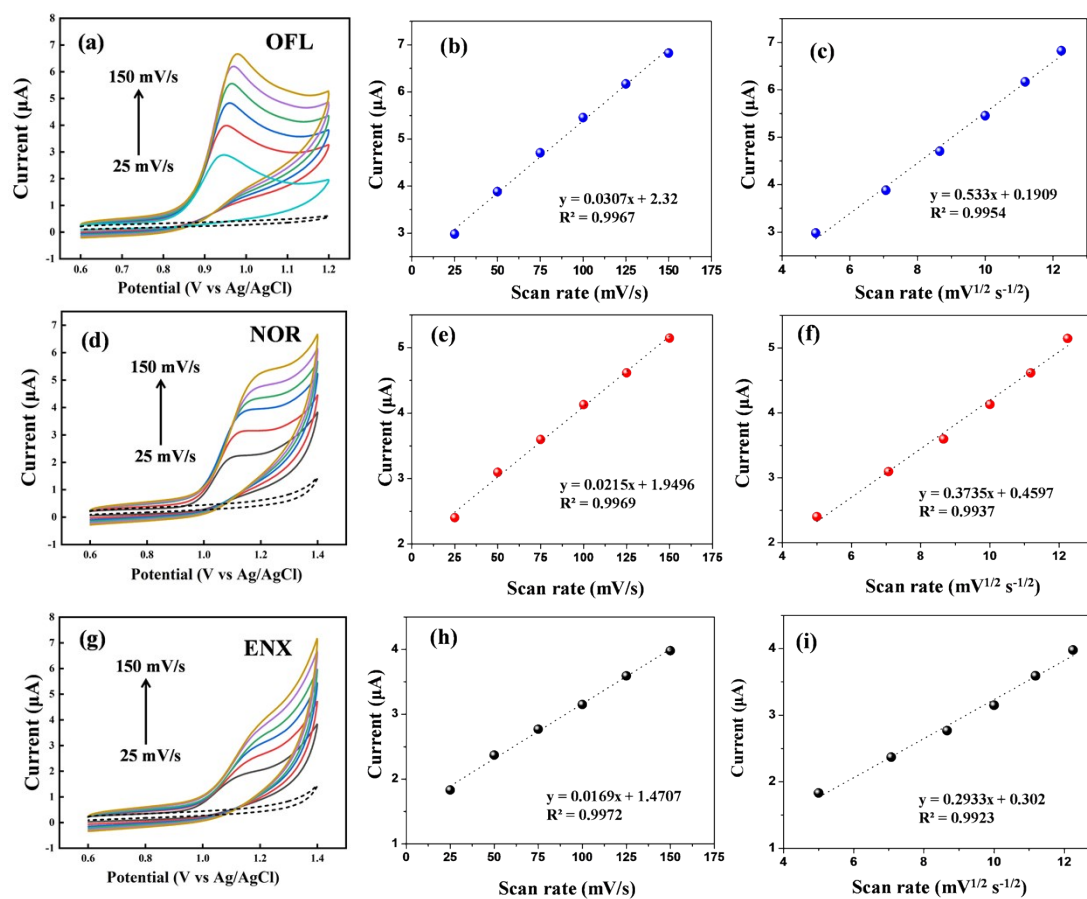

**Fig. S1** Effect of scan rate on the CV measurement of three antibiotics. (a-c) OFL, (d-f) NOR, (g-i) ENX. working electrode: GCE, 0.2 M PB solution (pH=7)

## Supplementary Material 2

Figure S2 shows a schematic diagram of the molecular structures of three antibiotics (OFL, NOR and ENX) under different pH conditions.

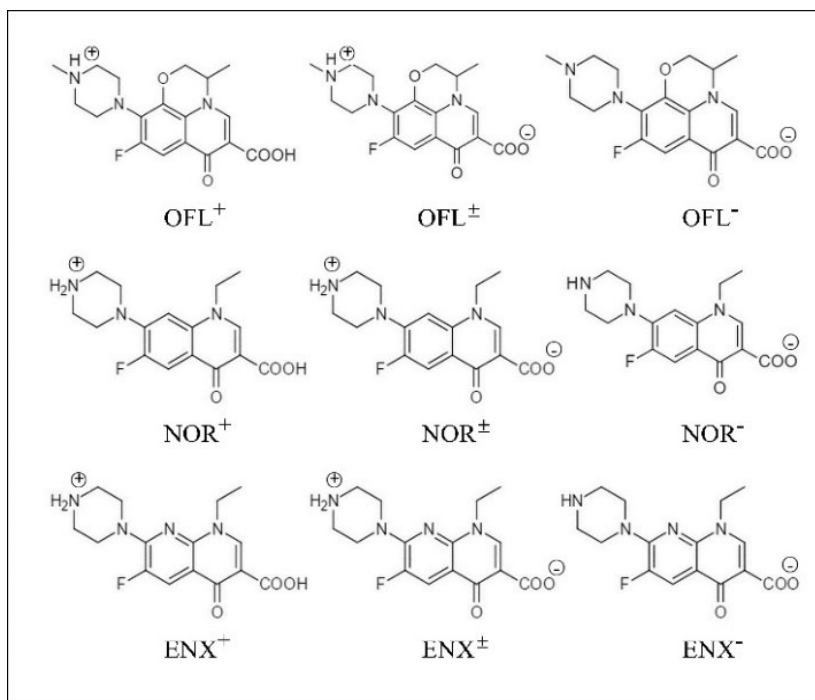

**Fig. S2** The diagrams of molecular structure of three antibiotics
